# Supplementary material
Source: publisher figshare collection journal article supplement (https://sage.figshare.com/ndownloader/files/23553695)
Supplement: Supplementary file 1 [file 23553695]

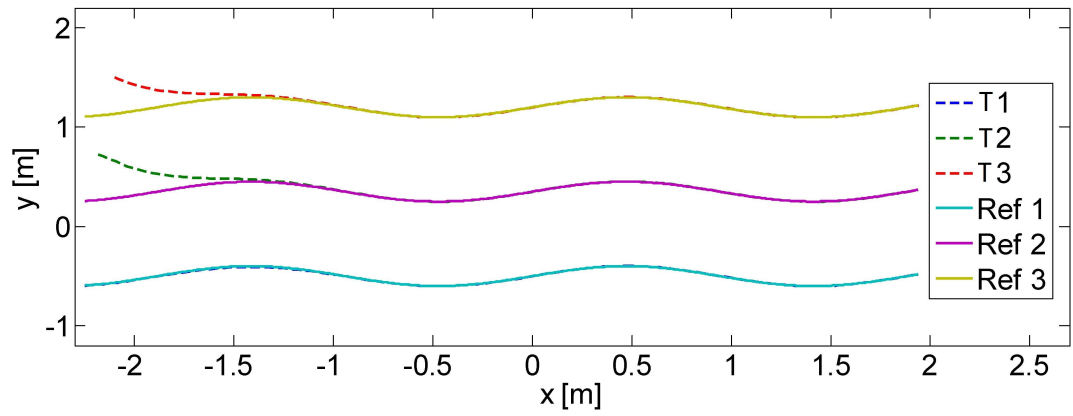

(a) No time delays

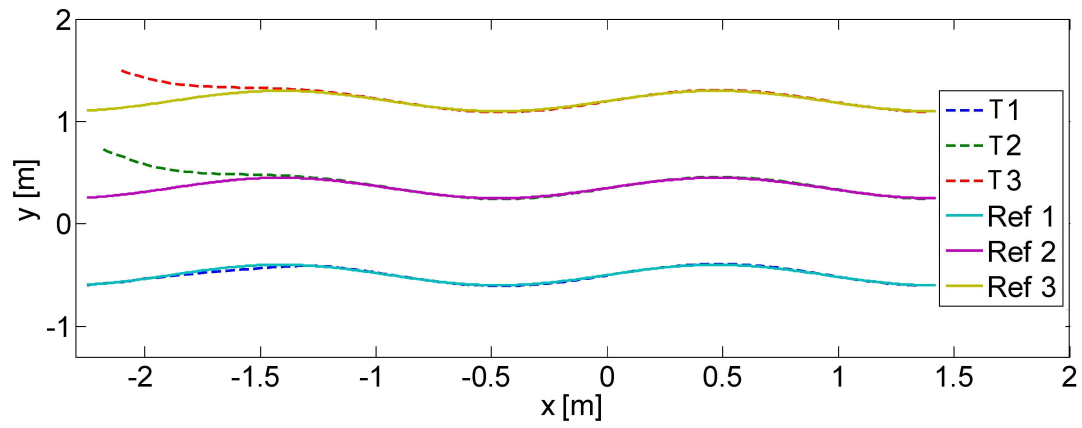(b)  $c = 5T$  (without NPCC)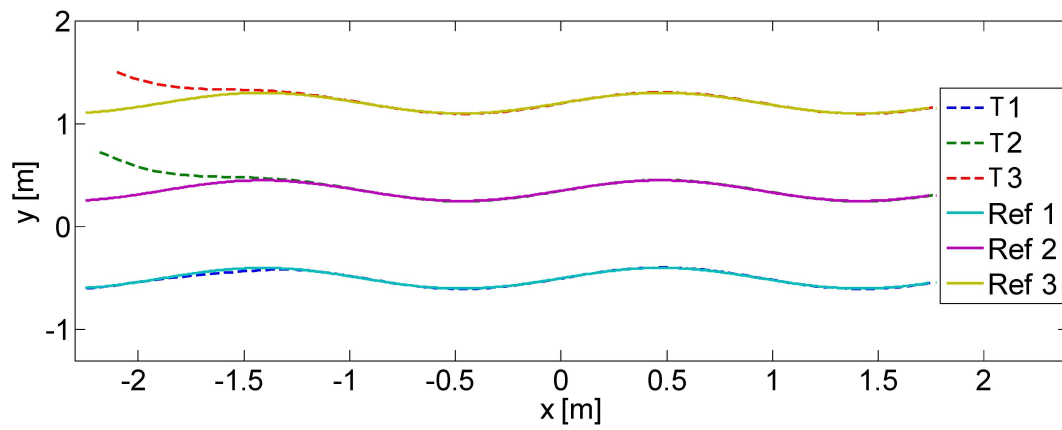(c)  $c = 5T$  (with NPCC)

Fig. 1. The trajectories of the hovercraft testbeds

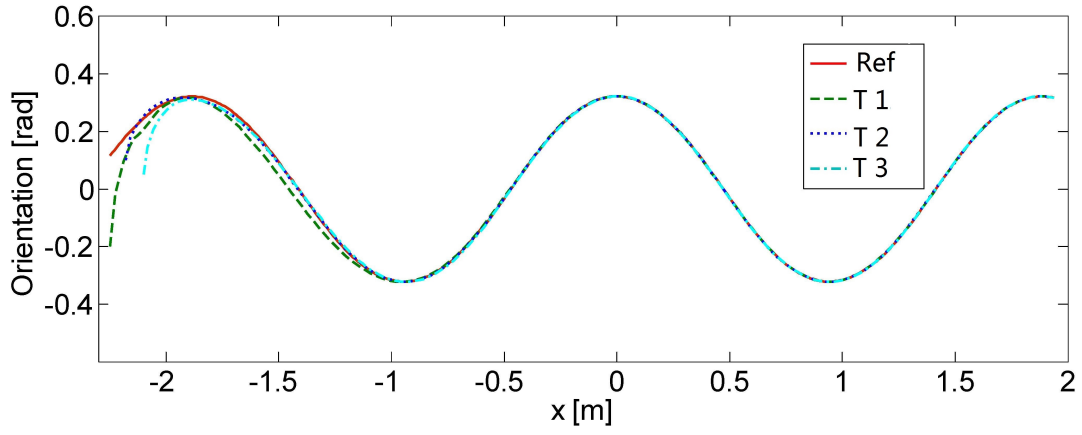

(a) No time delays

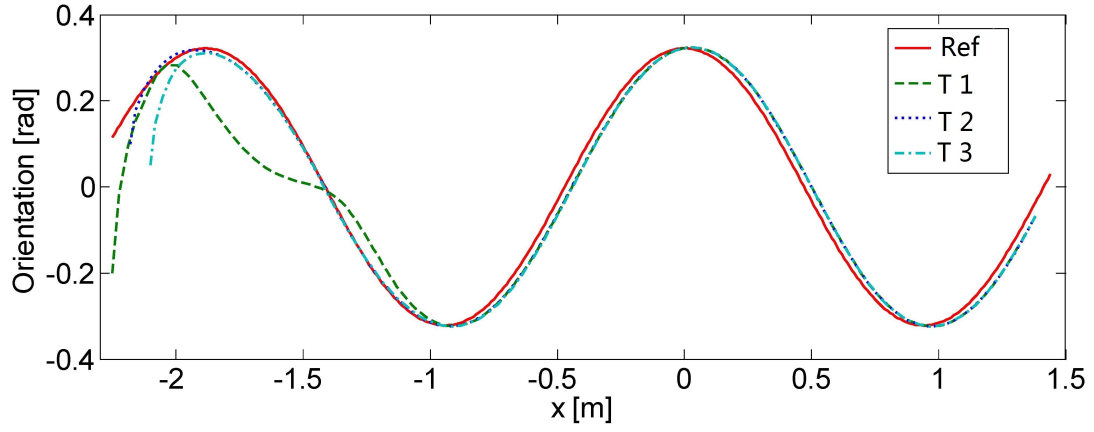(b)  $c = 5T$  (without NPCC)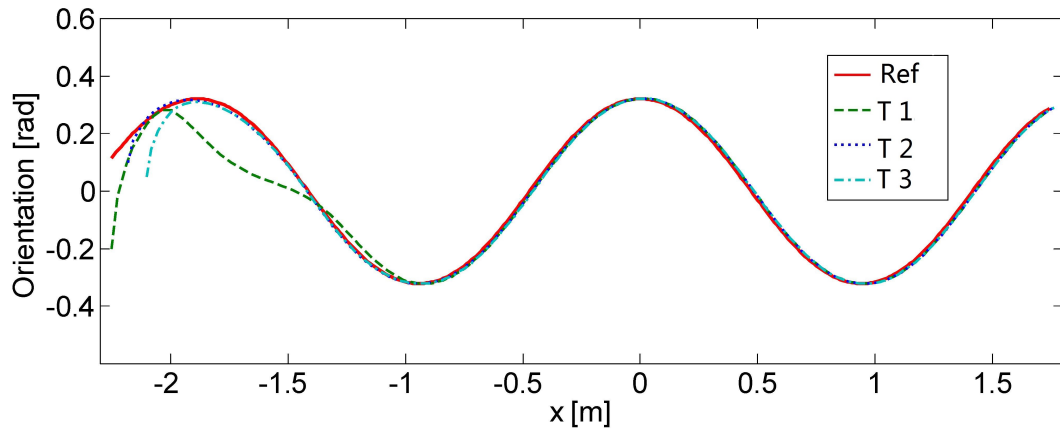(c)  $c = 5T$  (with NPCC)

Fig. 2. The attitudes of the hovercraft testbeds
